# Supplementary material
Source: PubMed Central journal article supplement (PMC9634859)
Supplement: NEJMc2207270_appendix.pdf [file NEJMc2207270_appendix.pdf]

## Supplementary Appendix

Supplement to: Witberg G, Magen O, Hoss S, et al. Myocarditis after BNT162b2 vaccination in Israeli adolescents. *N Engl J Med*. DOI: 10.1056/NEJMc2207270

This appendix has been provided by the authors to give readers additional information about the work.

# **BNT162b2 Vaccination Associated Myocarditis in Israeli Adolescents**

## **Supplementary material:**

### **Table of contents:**

|                                                                                                                         |      |
|-------------------------------------------------------------------------------------------------------------------------|------|
| Supplementary methods.....                                                                                              | 2-4  |
| ICD-9 codes and CDC case definition for vaccine associated myocarditis.....                                             | 5    |
| Figure S1 – Study flow chart.....                                                                                       | 6    |
| Table S1 - Baseline characteristics .....                                                                               | 7    |
| Table S2 – Incidence of myocarditis 42 days following receipt of the first vaccine dose, stratified by age and sex..... | 8    |
| Table S3 – Presentation clinical course during the index admission.....                                                 | 9-10 |
| Table S4 – Echocardiography at admission and discharge of index admission.....                                          | 11   |
| Supplementary references.....                                                                                           | 11   |

## **Supplementary methods:**

### **Setting**

This study is based on the data of Clalit Health Services. Clalit Health Services is the largest integrated payer-provider health care organization in Israel and provides care for 4.7 million patients (52% of the population). Outpatient care for Clalit Health Services patients is directly provided by the organization, while inpatient care is provided by both in-network hospitals (owned by Clalit Health Services) and out-of-network hospitals. The Clalit Health Services database used for this study have been previously described in detail [1].

### **Study design and data**

This study combined a retrospective cohort study design to evaluate the incidence of myocarditis following the vaccine and a case series to characterize the positive cases. Suspected cases occurring within 42 days of the first dose of the vaccine in adolescents 12-15 years of age were identified by searching for all matching international classification of disease 9 (ICD-9) diagnosis codes (see below) in individuals' electronic medical records, including those recorded for patients with a known history of myocarditis. All adolescents 12-15 who received at least one dose of vaccine between June 2<sup>nd</sup> 2021 and November 30<sup>th</sup> 2021 were included. The number of adolescents who left Clalit Health Services during the time of the study is not known so these individuals were treated as not having myocarditis. Electronic medical records for adjudicated cases were reviewed up to February 26<sup>th</sup>, 2022. The exact definition for myocarditis used in this study is detailed below.

## **Adjudication**

Each suspected case that was identified by electronic medical record review was adjudicated and verified through manual review of the patient's electronic medical record by two cardiologists, the first author (GW), who is a consultant cardiologist, and one of 8 other co-authors who are either consultant cardiologists (SH, YTB, MY, YA, AS, NSP) or cardiology fellows who are board certified in internal medicine (IR, TG). A case was considered as a true diagnosis if it met the CDC case definition for suspected/probable/confirmed myocarditis (see below). In case of disagreement between the reviewers, the senior author (RK), who is a consultant cardiologist, was to review the case and settle the dispute. The median number of confirmed cases per adjudicator was 1 (IQR 1-1)

## **Abstraction**

The data was collected from the index hospitalization (defined as the first hospitalization following vaccination where the diagnosis of myocarditis was mentioned) and from subsequent health records, including discharge letters from hospital admissions, clinic letters from community practices, results of imaging studies and laboratory tests, and documentation of medication prescription and procurement. In cases when patients were admitted to hospitals outside of the Clalit Health Services network, the hospitals were approached and a copy of the discharge letter was requested.

## **Statistical Analysis**

To estimate the incidence, individuals were followed until the earliest of outcome event, 42 days post-vaccination, death from unrelated causes (in the latter two cases they were considered censored). The cumulative incidence of myocarditis was

estimated using the Kaplan-Meier estimator 42 days after the first vaccine dose, stratified by age and sex. Categorical variables were summarized using counts (%), and continuous variables using the mean ( $\pm$ standard deviation) if their distribution appeared normal, or the median (interquartile range) otherwise. Outcome variables are presented noting the number of patients who had data in their chart regarding the specific variable.

### **Ethics**

This study was approved by the Clalit Health Services institutional review board. The study was exempt from informed consent. The First and Senior authors (GW, RK) vouch for the integrity of the data.

## Definition of Myocarditis used for Initial Search

ICD9 Codes: 422\*, ICD9 Code 429.0\*, ICD9 Code 398.0\*, ICD9 Code 391.2\*

Additional confirmation of the diagnostic codes was done by checking the matching of the free text within the diagnosis description field.

## CDC Case Definition of Vaccine associated Myocarditis

---

| Category       | Definition                                                                                                                                                                                                                                                                                                                                                                                                                                                                                                                                                                    |
|----------------|-------------------------------------------------------------------------------------------------------------------------------------------------------------------------------------------------------------------------------------------------------------------------------------------------------------------------------------------------------------------------------------------------------------------------------------------------------------------------------------------------------------------------------------------------------------------------------|
| Suspected Case | Dyspnea, palpitations, or chest pain of probable cardiac origin, with either one of the following:<br>A. ECG abnormalities beyond normal variants, not documented previously including:<br>- ST segment/T wave abnormalities<br>- Paroxysmal or sustained atrial or ventricular arrhythmia<br>- Atrioventricular nodal conduction delays or intraventricular conduction defects<br>- Continuous ambulatory ECG monitoring that detects frequent atrial or ventricular ectopy<br>B. Focal or diffuse depressed LV function of indeterminate age identified by an imaging study |
| Probable Case  | Meets criteria for suspected myocarditis, in the absence of other likely cause of symptoms, in addition to one of the following:<br>A. Elevated cardiac enzymes (troponin I, troponin T, or creatine kinase-MB)<br>B. New onset or increased degree of severity of focal or diffuse depressed LV function by imaging<br>C. Abnormal imaging findings indicating myocardial inflammation (CMR with gadolinium, gallium 67 scanning, antimyosin antibody scanning)                                                                                                              |
| Confirmed Case | A. Elevated cardiac enzymes (troponin I, troponin T, or creatine kinase-MB)<br>B. New onset or increased degree of severity of focal or diffuse depressed LV function by imaging<br>C. Abnormal imaging findings indicating myocardial inflammation (CMR with gadolinium, gallium 67 scanning, antimyosin antibody scanning)                                                                                                                                                                                                                                                  |

Legend: The definition used in the study to adjudicate cases. This definition was originally developed by the CDC to evaluate cardiac events after smallpox vaccine(2).

Abbreviations: ECG, electrocardiogram; LV, left ventricle; CMR, cardiac magnetic resonance imaging.

**Supplementary figures:**

**Figure S1 – Study flow chart**

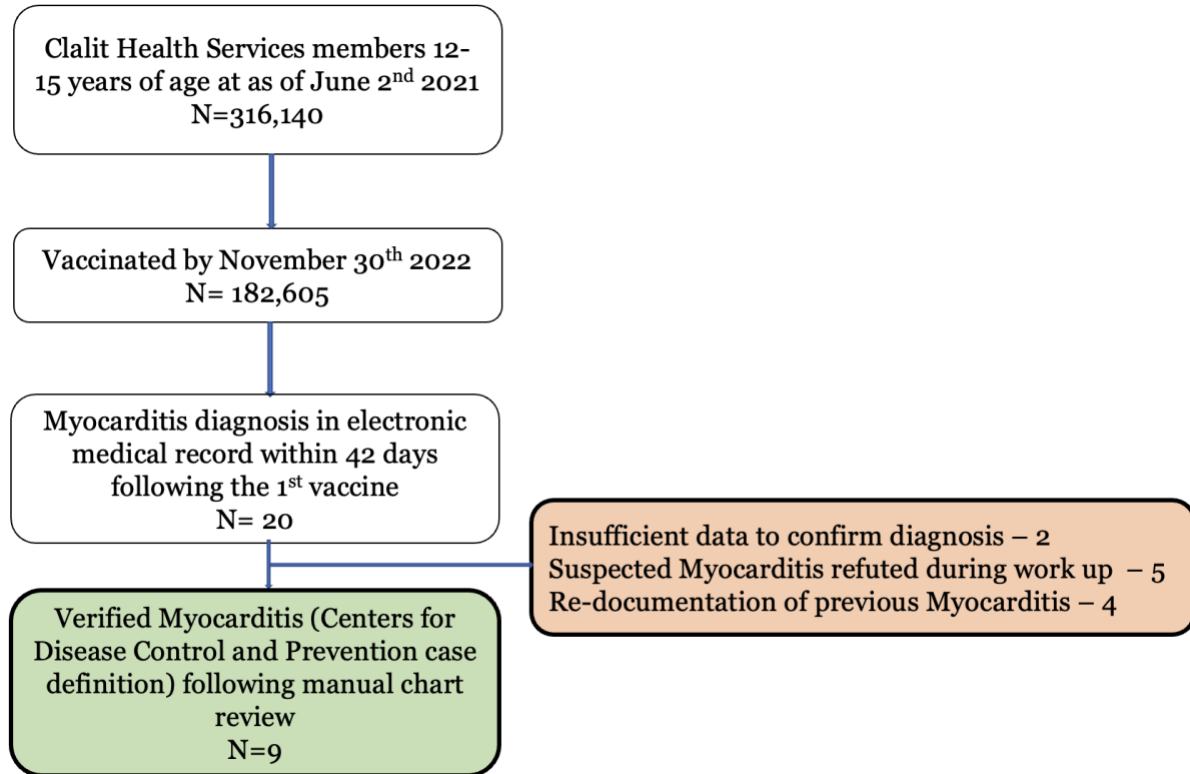

## Supplementary tables:

**Table S1 – Baseline characteristics of the verified myocarditis cases**

|                                        | Verified cases of myocarditis following<br>booster vaccination<br>N=9 | No myocarditis following<br>booster vaccination<br>N-182,596 |
|----------------------------------------|-----------------------------------------------------------------------|--------------------------------------------------------------|
| Age (years; median (IQR))              | 14 (13-14)                                                            | 13(12-14)                                                    |
| Sex (%)                                |                                                                       |                                                              |
| Female                                 | 1 (11.1%)                                                             | 90,385(49.5%)                                                |
| Male                                   | 8 (88.9%)                                                             | 92,211(50.5%)                                                |
| Population Sector (%)                  |                                                                       |                                                              |
| General Jewish                         | 9 (100%)                                                              | 121,609(66.6%)                                               |
| Arab                                   | 0 (0%)                                                                | 50,944(27.9%)                                                |
| Ultra-Orthodox Jewish                  | 0 (0%)                                                                | 10,1043(5.5%)                                                |
| Socioeconomic Status (%)               |                                                                       |                                                              |
| Low                                    | 4 (44.5%)                                                             | 102,802(56.3%)                                               |
| Medium                                 | 5 (55.5%)                                                             | 75,960(41.6%)                                                |
| High                                   | 0 (0%)                                                                | 3,834(2.1%)                                                  |
| <b>Background Diseases (%)</b>         |                                                                       |                                                              |
| Attention deficit hyperactive disorder | 1 (11.1%)                                                             |                                                              |
| Benign ethnic neutropenia              | 1 (11.1%)                                                             |                                                              |
| Previous Myocarditis                   | 0 (0%)                                                                |                                                              |
| Previous Pericarditis                  | 0 (0%)                                                                |                                                              |
| Known LV Dysfunction                   | 0 (0%)                                                                |                                                              |
| Any Background Disease                 | 2 (22.2%)                                                             |                                                              |
| <b>Baseline medication Use (%)</b>     |                                                                       |                                                              |
| Methylphenidate                        | 1 (11.1%)                                                             |                                                              |
| Any Baseline Medications               | 1 (11.1%)                                                             |                                                              |

Legend: baseline demographics characteristics, background diseases and baseline drug use of the verified myocarditis cases. Socioeconomic status is based on Clalit Health Services internal registries using the patient's primary care clinic location.

Abbreviations: IQR, interquartile range.



**Table S2 – Incidence of myocarditis 42 days following receipt of the first vaccine dose, stratified by age, sex and disease severity**

| Population        | N       | Number of cases | Incidence per 100,000 (95% CI) |
|-------------------|---------|-----------------|--------------------------------|
| <b>All Cases</b>  |         |                 |                                |
| Entire Population | 182,605 | 9               | 4.93 (1.7 – 8.15)              |
| Males             | 92,200  | 8               | 8.68 (2.66-14.69)              |
| Females           | 90,405  | 1               | 1.11 (0-3.27)                  |
| Age 12 years      | 46,953  | 1               | 2.13 (0-6.3)                   |
| Age 13 years      | 45,765  | 3               | 6.56 (0-13.97)                 |
| Age 14 years      | 45,107  | 3               | 6.65 (0-14.17)                 |
| Age 15 years      | 44,780  | 2               | 4.47(0-10.66)                  |

Legend: Incidence proportion per 100,000 individuals was estimated using the Kaplan-Meier estimator. Disease severity was defined as detailed in the text. CI: Confidence Interval.

Total Population, Ages 12-15: 316,140

**Table S3 – Presentation clinical course during the index admission**

| <b>Variable</b>                               | <b>Statistic</b> | <b>Number of cases with available data</b> |
|-----------------------------------------------|------------------|--------------------------------------------|
| <b>Presentation</b>                           |                  |                                            |
| <b>Presenting Symptoms and Signs</b>          |                  |                                            |
| Chest pain (%)                                | 9/9(100.0%)      | 9                                          |
| Palpitations (%)                              | 1/9(11.1%)       | 9                                          |
| Dyspnea (%)                                   | 2/9(22.2%)       | 9                                          |
| Fever (%)                                     | 7/9(77.7%)       | 9                                          |
| Nausea and vomiting (%)                       | 3/9(33.3%)       | 9                                          |
| Myalgia (%)                                   | 1/9(11.1%)       | 9                                          |
| Pleuritic pain (%)                            | 1/9(11.1%)       | 9                                          |
| Symptoms of viral infection (%)               | 0/9(0%)          | 9                                          |
| Pericardial Effusion (%)                      | 4/9(44.4%)       | 9                                          |
| <b>Vital signs on admission</b>               |                  |                                            |
| Temperature on admission (Mean±SD)            | 37.8±0.8         | 9                                          |
| Systolic Blood Pressure (Mean±SD)             | 114.5±14.2       | 9                                          |
| Diastolic Blood Pressure (Mean±SD)            | 66.2±11.1        | 9                                          |
| Heart Rate (Mean±SD)                          | 90.8±13.1        | 9                                          |
| Shock (%)                                     | 0/9 (0%)         | 9                                          |
| <b>ECG Findings</b>                           |                  |                                            |
| Normal (%)                                    | 3/9(33.3%)       | 9                                          |
| Diffuse ST Elevation (%)                      | 2/9(22.2%)       | 9                                          |
| Non-Diffuse ST Elevation (%)                  | 3/9(33.3%)       | 9                                          |
| ST segment depression (%)                     | 1/9(11.1%)       | 9                                          |
| T wave changes (%)                            | 1/9(11.1%)       | 9                                          |
| <b>Laboratory Values</b>                      |                  |                                            |
| Troponin T (Median (IQR))                     | 820(716-940)     | 7                                          |
| Troponin I (Median (IQR))                     | 9487(4631-14613) | 2                                          |
| Creatine Kinase (Median (IQR))                | 602 (398-792)    | 6                                          |
| C-Reactive Protein (Median (IQR))             | 8.5(1.6-11.0)    | 9                                          |
| Hemoglobin (Median (IQR))                     | 13.4 (12.4-14.2) | 8                                          |
| White Blood Cells (Median (IQR))              | 6.8 (5.2-8.0)    | 7                                          |
| Erythrocyte sedimentation rate (Median (IQR)) | 13 (13-13-13)    | 2                                          |
| <b>Circulatory Support</b>                    |                  |                                            |
| Need for inotropes/vasopressors (%)           | 0/9 (0%)         | 9                                          |
| Need for mechanical circulatory support (%)   | 0/9 (0%)         | 9                                          |

| <b>Variable</b>                                     | <b>Statistic</b> | <b>Number of cases with available data</b> |
|-----------------------------------------------------|------------------|--------------------------------------------|
| <b>Clinical Course during Index Hospitalization</b> |                  |                                            |
| Need for inotropes/vasopressors (%)                 | 0/9 (0%)         | 9                                          |
| Need for mechanical circulatory support (%)         | 0/9 (0%)         | 9                                          |
| Arrhythmias (%)                                     | 0/9 (0%)         | 9                                          |
| <b>Medications at Discharge</b>                     |                  |                                            |
| NSAIDS (%)                                          | 6/9 (66.6%)      | 9                                          |
| Colchicine (%)                                      | 1/9 (11.1%)      | 9                                          |
| <b>Admission length</b>                             |                  |                                            |
| Length of stay (days) (Median (IQR))                | 3 (2-4)          | 9                                          |

Legend: Characteristics of the verified myocarditis cases at presentation to the index hospitalization, during the index hospitalization and following discharge. For each variable, the number of cases with data on that row is detailed. Length of stay (days) (Median (IQR))

Abbreviations: SD, standard deviation; IQR, inter-quartile range; ACE-I, acetyl cholinesterase inhibitors; ARB, angiotensin receptor antagonists; NSAIDS, non-steroidal anti-inflammatory drugs; NOAC, novel oral anticoagulants.

**Table S4 – Echocardiographic assessment during the index admission**

| <b>Variable</b>                                      |                | <b>Number of cases with available data</b> |
|------------------------------------------------------|----------------|--------------------------------------------|
| Qualitative Left Ventricular Function Assessment (%) |                | 9                                          |
| Normal                                               | 8/9(88.9%)     |                                            |
| Mild dysfunction                                     | 1/9(11.1%)     |                                            |
| Ejection Fraction (Mean±SD)                          | 60.0±5.0 (N=5) | 5                                          |
| Pericardial effusion (%)                             | 4/9(44.4%)     | 9                                          |
| Minimal (%)                                          | 1/9(11.1%)     |                                            |
| Small (%)                                            | 2/9(22.1%)     |                                            |
| Unspecified (%)                                      | 1/9(11.1%)     |                                            |

Legend: Qualitative left ventricular function and estimated ejection fraction per trans-thoracic echocardiography performed at admission and discharge from the index hospitalization for myocarditis following vaccination.

Abbreviations: SD, Standard Deviation

\* Resolution of pericardial effusion in 2 cases with available TTE on follow up (in both cases the effusion was small to begin with).

### **Supplementary references:**

[1] Dagan N, Barda N, Kepten E, Miron O, Perchik S, Katz MA, et al. BNT162b2 mRNA Covid-19 Vaccine in a Nationwide Mass Vaccination Setting. *N Engl J Med.* 2021 Apr 15;384(15):1412–1423.

[2]. Centers for Disease Control and Prevention (CDC). Update: cardiac-related events during the civilian smallpox vaccination program--United States, 2003. *MMWR Morb Mortal Wkly Rep.* 2003 May 30;52(21):492–496.
