# Supplementary material
Source: PubMed Central journal article supplement (PMC9634859)
Supplement: NEJMc2207270_disclosures.pdf [file NEJMc2207270_disclosures.pdf]

Disclosure Purpose: 22-07270

Summary of Interests

**Company or Organization**

| Entity | Type             | Interest Held By |
|--------|------------------|------------------|
| Pfizer | Grant / Contract | Self             |

*Recipient Name:* Clalit Research Institute  
*Grant / Contract Description:* Institutional grants to Clalit Research Institute from Pfizer outside the submitted work

*Recipient Type:* Institution  
*Grant / Contract Purpose:* Research  
*Additional Information:* Institutional grants to Clalit Research Institute from Pfizer outside the submitted work and unrelated to Covid-19, with no direct or indirect personal benefits.

Additional Questions:

- Are there other relationships or activities that readers could perceive to have influenced, or that give the appearance of potentially influencing, what you wrote in the submitted work?**  
No.
- What is the manuscript title?**  
BNT162b2 Vaccination Associated Myocarditis in Israeli Adolescents
- Are you the corresponding author?**  
No.

Certification

I certify that the information provided in this disclosure is complete and accurate.

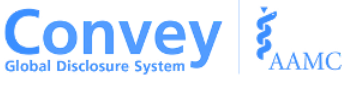

**Disclosure Purpose:** 22-07270

### Summary of Interests

I do not have any interests to disclose at this time.

### Additional Questions:

- Are there other relationships or activities that readers could perceive to have influenced, or that give the appearance of potentially influencing, what you wrote in the submitted work?**  
No.
- What is the manuscript title?**  
BNT162b2 Vaccination Associated Myocarditis in Israeli Adolescents
- Are you the corresponding author?**  
No.

### Certification

I certify that the information provided in this disclosure is complete and accurate.

Disclosure Purpose: 22-07270

## Summary of Interests

### Company or Organization

| Entity                                                                                                                                                                                        | Type             | Interest Held By                                                                                                                                                          |
|-----------------------------------------------------------------------------------------------------------------------------------------------------------------------------------------------|------------------|---------------------------------------------------------------------------------------------------------------------------------------------------------------------------|
| Pfizer                                                                                                                                                                                        | Grant / Contract | Other - Institutional grants to Clalit Research Institute from Pfizer outside the submitted work and unrelated to COVID-19, with no direct or indirect personal benefits. |
| <i>Recipient Name:</i> Clalit Research Institute<br><i>Grant / Contract Description:</i> Institutional grants to Clalit Research Institute from Pfizer outside the submitted work and unrelat |                  | <i>Recipient Type:</i> Institution<br><i>Grant / Contract Purpose:</i> Research<br><i>Additional Information:</i>                                                         |

## Additional Questions:

- Are there other relationships or activities that readers could perceive to have influenced, or that give the appearance of potentially influencing, what you wrote in the submitted work?**  
No.
- What is the manuscript title?**  
BNT162b2 Vaccination Associated Myocarditis in Israeli Adolescents
- Are you the corresponding author?**  
No.

## Certification

I certify that the information provided in this disclosure is complete and accurate.

**Discloser Identifier:** 1079867

**Disclosure Purpose:** 22-07270

## Summary of Interests

I do not have any interests to disclose at this time.

## Additional Questions

1. **Are there other relationships or activities that readers could perceive to have influenced, or that give the appearance of potentially influencing, what you wrote in the submitted work?**

No.

2. **What is the manuscript title?**

BNT162b2 Vaccination Associated Myocarditis in Israeli Adolescents

3. **Are you the corresponding author?**

No.

## Certification

I certify that the information provided in this disclosure is complete and accurate.

Disclosure Purpose: 22-07270

Summary of Interests

**Company or Organization**

| Entity | Type             | Interest Held By |
|--------|------------------|------------------|
| Pfizer | Grant / Contract | Self             |

*Recipient Name:* Clalit Research Institute  
*Grant / Contract Description:* Institutional grants to Clalit Research Institute from Pfizer outside the submitted work

*Recipient Type:* Institution  
*Grant / Contract Purpose:* Research  
*Additional Information:* Institutional grants to Clalit Research Institute from Pfizer outside the submitted work and unrelated to COVID-19, with no direct or indirect personal benefits.

Additional Questions:

- Are there other relationships or activities that readers could perceive to have influenced, or that give the appearance of potentially influencing, what you wrote in the submitted work?**  
No.
- What is the manuscript title?**  
BNT162b2 Vaccination Associated Myocarditis in Israeli Adolescents
- Are you the corresponding author?**  
No.

Certification

I certify that the information provided in this disclosure is complete and accurate.

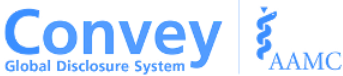

**Disclosure Purpose:** 22-07270

### Summary of Interests

I do not have any interests to disclose at this time.

### Additional Questions:

- Are there other relationships or activities that readers could perceive to have influenced, or that give the appearance of potentially influencing, what you wrote in the submitted work?**  
No.
- What is the manuscript title?**  
BNT162b2 Vaccination Associated Myocarditis in Israeli Adolescents
- Are you the corresponding author?**  
No.

### Certification

I certify that the information provided in this disclosure is complete and accurate.

**Disclosure Purpose:** 22-07270

**Summary of Interests**

I do not have any interests to disclose at this time.

**Additional Questions:**

- Are there other relationships or activities that readers could perceive to have influenced, or that give the appearance of potentially influencing, what you wrote in the submitted work?**  
No.
- What is the manuscript title?**  
BNT162b2 Vaccination Associated Myocarditis in Israeli Adolescents
- Are you the corresponding author?**  
No.

**Certification**

I certify that the information provided in this disclosure is complete and accurate.

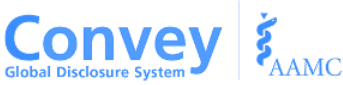

**Disclosure Purpose:** 22-07270

### Summary of Interests

I do not have any interests to disclose at this time.

### Additional Questions:

- Are there other relationships or activities that readers could perceive to have influenced, or that give the appearance of potentially influencing, what you wrote in the submitted work?**  
No.
- What is the manuscript title?**  
BNT162b2 Vaccination Associated Myocarditis in Israeli Adolescents
- Are you the corresponding author?**  
No.

### Certification

I certify that the information provided in this disclosure is complete and accurate.



Disclosure Purpose: 22-07270

## Summary of Interests

### Company or Organization

| Entity                                                                                                                                                                            | Type             | Interest Held By                                                                                                                                                                                                                                                                    |
|-----------------------------------------------------------------------------------------------------------------------------------------------------------------------------------|------------------|-------------------------------------------------------------------------------------------------------------------------------------------------------------------------------------------------------------------------------------------------------------------------------------|
| Pfizer                                                                                                                                                                            | Grant / Contract | Self                                                                                                                                                                                                                                                                                |
| <i>Recipient Name:</i> Clalit Research Institute<br><i>Grant / Contract Description:</i> Institutional grants to Clalit Research Institute from Pfizer outside the submitted work |                  | <i>Recipient Type:</i> Institution<br><i>Grant / Contract Purpose:</i> Research<br><i>Additional Information:</i> Institutional grants to Clalit Research Institute from Pfizer outside the submitted work and unrelated to COVID-19, with no direct or indirect personal benefits. |

## Additional Questions:

- Are there other relationships or activities that readers could perceive to have influenced, or that give the appearance of potentially influencing, what you wrote in the submitted work?**  
No.
- What is the manuscript title?**  
BNT162b2 Vaccination Associated Myocarditis in Israeli Adolescents
- Are you the corresponding author?**  
No.

## Certification

I certify that the information provided in this disclosure is complete and accurate.

**Disclosure Purpose:** 22-07270

**Summary of Interests**

I do not have any interests to disclose at this time.

**Additional Questions:**

- 1. **Are there other relationships or activities that readers could perceive to have influenced, or that give the appearance of potentially influencing, what you wrote in the submitted work?**  
No.
- 2. **What is the manuscript title?**  
BNT162b2 Vaccination Associated Myocarditis in Israeli Adolescents
- 3. **Are you the corresponding author?**  
No.

**Certification**

I certify that the information provided in this disclosure is complete and accurate.

**Disclosure Purpose:** 22-07270

### Summary of Interests

I do not have any interests to disclose at this time.

### Additional Questions:

- Are there other relationships or activities that readers could perceive to have influenced, or that give the appearance of potentially influencing, what you wrote in the submitted work?**  
No.
- What is the manuscript title?**  
BNT162b2 Vaccination Associated Myocarditis in Israeli Adolescents
- Are you the corresponding author?**  
No.

### Certification

I certify that the information provided in this disclosure is complete and accurate.

Disclosure Purpose: 22-07270

Summary of Interests

**Company or Organization**

| Entity                                                                 | Type  | Interest Held By                                                                                                 |
|------------------------------------------------------------------------|-------|------------------------------------------------------------------------------------------------------------------|
| Pfizer                                                                 | Other | Self                                                                                                             |
| <i>Category:</i> Other<br><i>Additional Information:</i> Pfizer Israel |       | <i>Description:</i> I received an honorarium from Pfizer Israel associated with research on atrial fibrillation. |

Additional Questions:

- Are there other relationships or activities that readers could perceive to have influenced, or that give the appearance of potentially influencing, what you wrote in the submitted work?**  
No.
- What is the manuscript title?**  
BNT162b2 Vaccination Associated Myocarditis in Israeli Adolescents
- Are you the corresponding author?**  
No.

Certification

I certify that the information provided in this disclosure is complete and accurate.

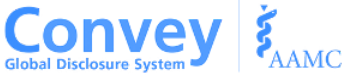

**Disclosure Purpose:** 22-07270

### Summary of Interests

I do not have any interests to disclose at this time.

### Additional Questions:

- Are there other relationships or activities that readers could perceive to have influenced, or that give the appearance of potentially influencing, what you wrote in the submitted work?**  
No.
- What is the manuscript title?**  
BNT162b2 Vaccination Associated Myocarditis in Israeli Adolescents
- Are you the corresponding author?**  
No.

### Certification

I certify that the information provided in this disclosure is complete and accurate.

**Disclosure Purpose:** 22-07270

### Summary of Interests

I do not have any interests to disclose at this time.

### Additional Questions:

- Are there other relationships or activities that readers could perceive to have influenced, or that give the appearance of potentially influencing, what you wrote in the submitted work?**  
No.
- What is the manuscript title?**  
BNT162b2 Vaccination Associated Myocarditis in Israeli Adolescents
- Are you the corresponding author?**  
No.

### Certification

I certify that the information provided in this disclosure is complete and accurate.

Disclosure Purpose: 22-07270

## Summary of Interests

I do not have any interests to disclose at this time.

## Additional Questions:

1. **Are there other relationships or activities that readers could perceive to have influenced, or that give the appearance of potentially influencing, what you wrote in the submitted work?**No.
2. **What is the manuscript title?**  
BNT162b2 Vaccination Associated Myocarditis in Israeli Adolescents
3. **Are you the corresponding author?**  
Yes.
  - a. **Please list the other authors' names here.**  
Ori Magen, Sara Hoss, Yeela Talmor-Barkan, Ilan Richter, Maya Wiessman, Yaron Aviv, Tzlil Grinberg, Arthur Shiyovitch, Nili Schamroth-Pravda, Oren Auster, Noa Dagan, Einat Birk, Ran Balicer, Ran Kornowski

## Certification

I certify that the information provided in this disclosure is complete and accurate.
